# Supplementary material
Source: PubMed Central journal article supplement (PMC4317760)

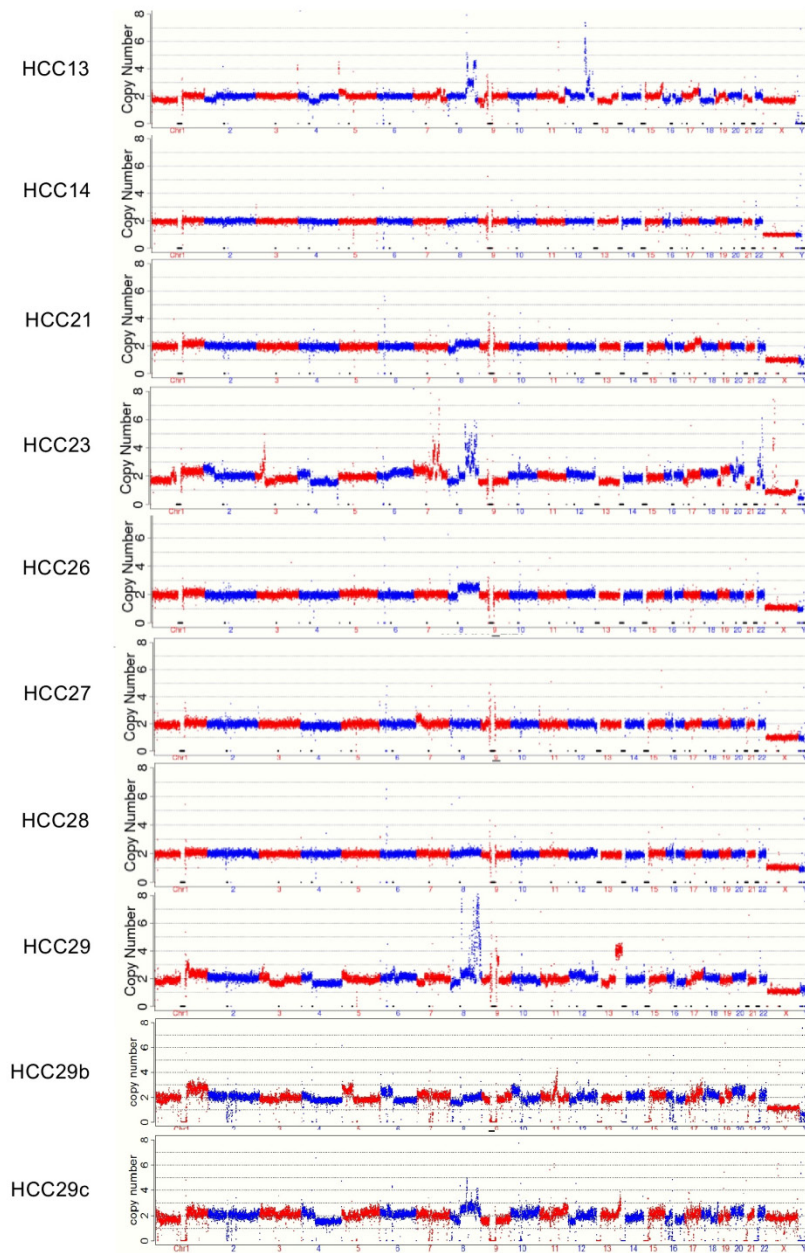

Figure S1: Summarized were additional visual CNV change data in this study not shown in Figure 2.

Supplement: jcav06p0247s1.pdf [file jcav06p0247s1.pdf]
